# Supplementary material for: Solute–solvent hydrogen-bonding in room temperature ionic liquids studied by Raman spectroscopy
Source: Royal Society of Chemistry journal article supplement (doi:10.1039/c2cp41567d), 2012-01-01

## 1. Structures and abbreviations of cations and anions used in this study

### Cations

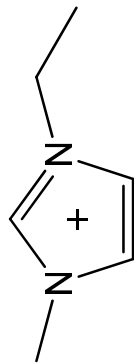

[EMIm]<sup>+</sup>: 1-ethyl-3-methylimidazolium

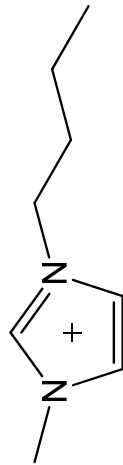

[BMIm]<sup>+</sup>: 1-butyl-3-methylimidazolium

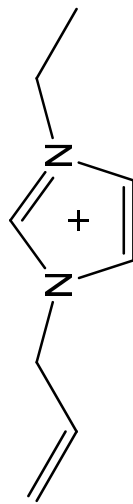

[AEIm]<sup>+</sup>: 1-allyl-3-ethylimidazolium

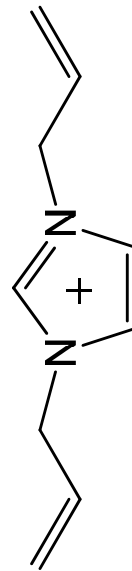

[AAIm]<sup>+</sup>: 1,3-Diallylimidazolium

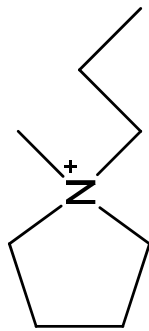

[P13]<sup>+</sup>: *N*-methyl-*N*-propylpyrrolidinium

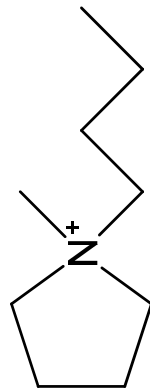

[P14]<sup>+</sup>: *N*-butyl-*N*-methylpyrrolidinium

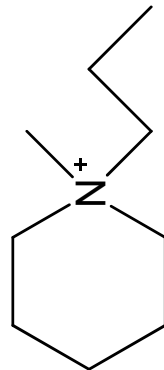

[Pp13]<sup>+</sup>: *N*-methyl-*N*-propylpiperidinium

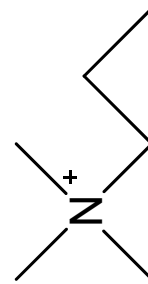

[N<sub>1,1,1,3</sub>]<sup>+</sup>: *N,N,N*-trimethyl-*N*-propylammonium

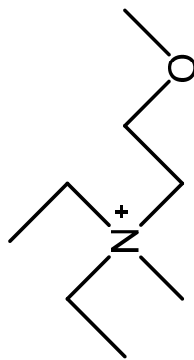

[DEME]<sup>+</sup>: *N,N*-Deethyl-*N*-methyl-*N*-(2-methoxyethyl)ammonium

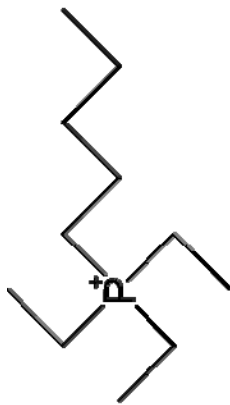

[P<sub>2,2,2,5</sub>]<sup>+</sup>: pentyltriethylphosphonium

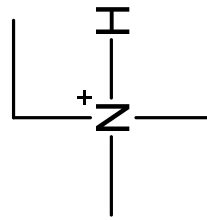

[DEMAH]: *N*-methyl-*N,N*-ethylammonium

## Anions

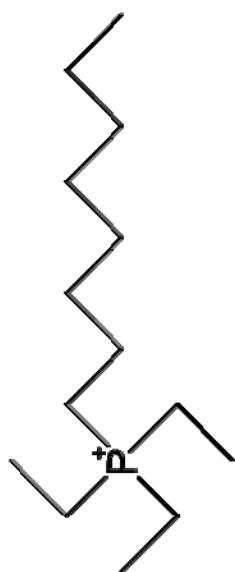

[P<sub>2,2,2,8</sub>]<sup>+</sup>: Octyltriethylphosphonium

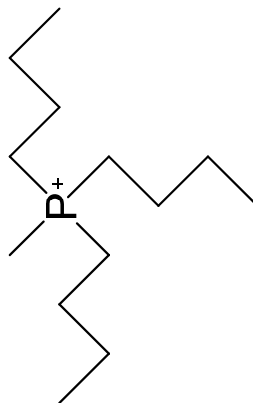

[P<sub>4,4,4,1</sub>]<sup>+</sup>: methyltributylphosphonium

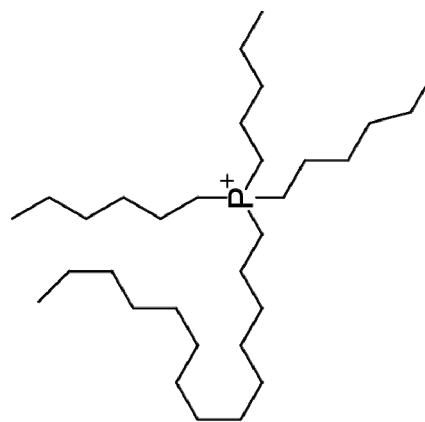

[P<sub>6,6,6,14</sub>]<sup>+</sup>: tetradecyltriethylphosphonium

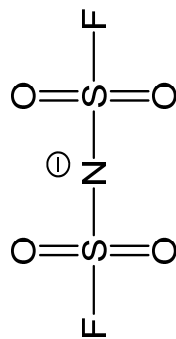

[Nf<sub>2</sub>]<sup>-</sup>: bis(fluorosulfonyl)amide

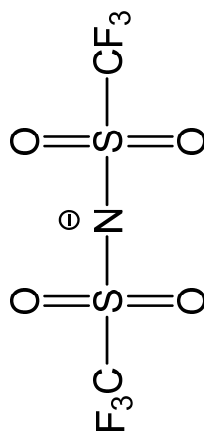

[NTf<sub>2</sub>]<sup>-</sup>: bis(trifluoromethanesulfonyl)amide

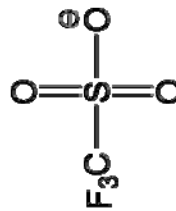

[TfO]<sup>-</sup>: trifluoromethanesulfonate

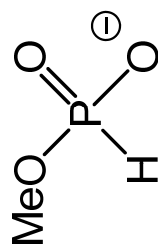

[(MeO)(H)PO<sub>2</sub>]<sup>-</sup>: methylphosphonate

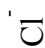

[PF<sub>6</sub>]<sup>-</sup>: hexafluorophosphate

[BF<sub>4</sub>]<sup>-</sup>: tetrafluoroborate

## 2. Molecular structures used as probes in this study.

*p*-Aminobenzonitrile (ABN)

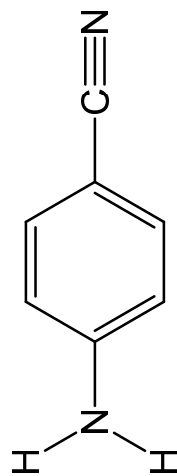

Diphenylcyclopropenone (DPCP)

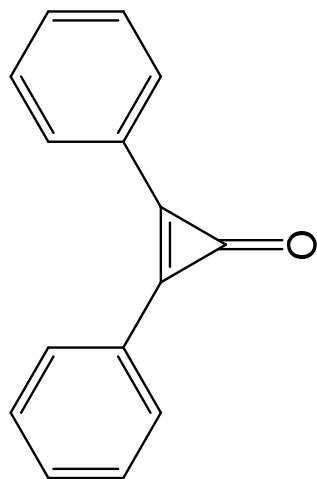

*p*-Nitroaniline (pNA)

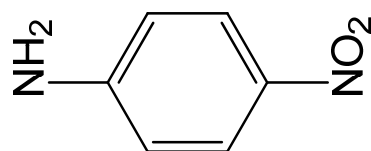

*N,N*-Diethyl-*p*-nitroaniline (DEPNA)

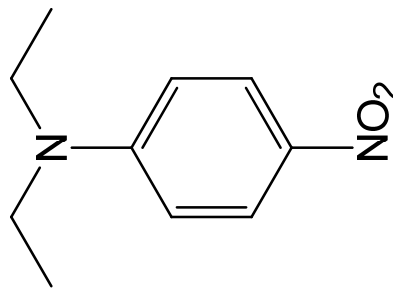

*N,N*-Dimethyl-*p*-nitroaniline (DMPNA)

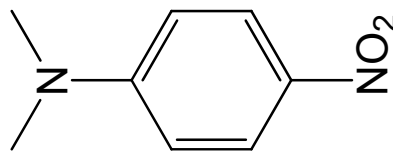

Reichardt dye

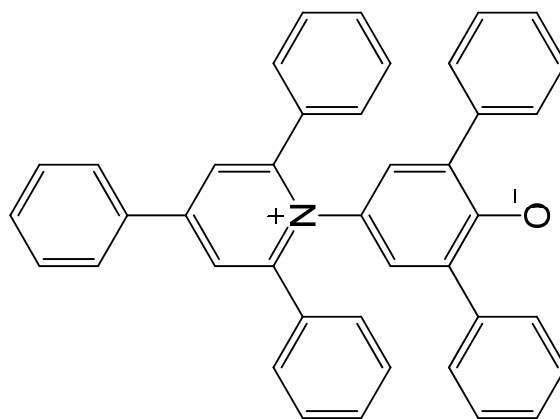

**3. Table of Stabilization energy of the cluster and the relative shift of the vibrational frequencies of CN and NH<sub>2</sub> stretching modes calculated by DFT (B3PW91 functional and 6-311G++(d,p) basis set) using Gaussian 09.**

| Anion                        | Symmetric | Asymmetric                                                                                                                                                                                                                                  |
|------------------------------|-----------|---------------------------------------------------------------------------------------------------------------------------------------------------------------------------------------------------------------------------------------------|
| Cl <sup>-</sup>              |           | (a) 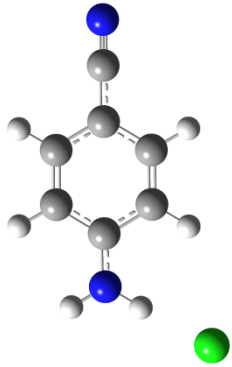<br>$\Delta E = -25.21 \text{ kcal mol}^{-1}$<br>$\Delta V_{\text{NH}_2} = -668.86 \text{ cm}^{-1}$<br>$\Delta V_{\text{CN}} = -34.81 \text{ cm}^{-1}$ |
| PF <sub>6</sub> <sup>-</sup> |           | (b) <br>$\Delta E = -16.07 \text{ kcal mol}^{-1}$<br>$\Delta V_{\text{NH}_2} = -92.06 \text{ cm}^{-1}$<br>$\Delta V_{\text{CN}} = -24.92 \text{ cm}^{-1}$  |
| BF <sub>4</sub> <sup>-</sup> |           | (c) <br>$\Delta E = -18.61 \text{ kcal/mol}$<br>$\Delta V_{\text{NH}_2} = -190.15 \text{ cm}^{-1}$<br>$\Delta V_{\text{CN}} = -26.35 \text{ cm}^{-1}$     |

|                              |     |                                                                                                                                                                                                                                                                                                                                           |                                                                                                                                                                                                                                                                                                                                            |
|------------------------------|-----|-------------------------------------------------------------------------------------------------------------------------------------------------------------------------------------------------------------------------------------------------------------------------------------------------------------------------------------------|--------------------------------------------------------------------------------------------------------------------------------------------------------------------------------------------------------------------------------------------------------------------------------------------------------------------------------------------|
|                              |     | (d)                                                                                                                                                                                                                                                                                                                                       | 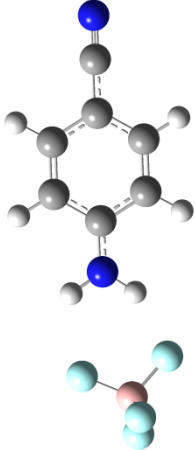 <p> <math>\Delta E =</math><br/> <math>-19.38 \text{ kcal mol}^{-1}</math><br/> <math>\Delta V_{\text{NH}_2} =</math><br/> <math>-99.08 \text{ cm}^{-1}</math><br/> <math>\Delta V_{\text{CN}} =</math><br/> <math>-28.21 \text{ cm}^{-1}</math> </p>    |
| TfO <sup>-</sup>             | (e) |  <p> <math>\Delta E =</math><br/> <math>-19.45 \text{ kcal mol}^{-1}</math><br/> <math>\Delta V_{\text{NH}_2} =</math><br/> <math>-85.27 \text{ cm}^{-1}</math><br/> <math>\Delta V_{\text{CN}} =</math><br/> <math>-28.24 \text{ cm}^{-1}</math> </p> |                                                                                                                                                                                                                                                                                                                                            |
|                              |     | (f)                                                                                                                                                                                                                                                                                                                                       |  <p> <math>\Delta E =</math><br/> <math>-18.92 \text{ kcal mol}^{-1}</math><br/> <math>\Delta V_{\text{NH}_2} =</math><br/> <math>-279.93 \text{ cm}^{-1}</math><br/> <math>\Delta V_{\text{CN}} =</math><br/> <math>-26.83 \text{ cm}^{-1}</math> </p>   |
|                              |     | (g)                                                                                                                                                                                                                                                                                                                                       |  <p> <math>\Delta E =</math><br/> <math>-16.74 \text{ kcal mol}^{-1}</math><br/> <math>\Delta V_{\text{NH}_2} =</math><br/> <math>-76.56 \text{ cm}^{-1}</math><br/> <math>\Delta V_{\text{CN}} =</math><br/> <math>-25.24 \text{ cm}^{-1}</math> </p>   |
| Nf <sub>2</sub> <sup>-</sup> |     | (h)                                                                                                                                                                                                                                                                                                                                       |  <p> <math>\Delta E =</math><br/> <math>-16.76 \text{ kcal mol}^{-1}</math><br/> <math>\Delta V_{\text{NH}_2} =</math><br/> <math>-165.24 \text{ cm}^{-1}</math><br/> <math>\Delta V_{\text{CN}} =</math><br/> <math>-24.78 \text{ cm}^{-1}</math> </p> |

|                                    |                                                                                                                                                                                                                                                                                                                                                      |                                                                                                                                                                                                                                                                                                                                                    |
|------------------------------------|------------------------------------------------------------------------------------------------------------------------------------------------------------------------------------------------------------------------------------------------------------------------------------------------------------------------------------------------------|----------------------------------------------------------------------------------------------------------------------------------------------------------------------------------------------------------------------------------------------------------------------------------------------------------------------------------------------------|
|                                    | <p>(i)</p> 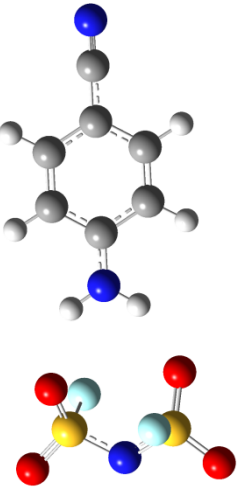 <p><math>\Delta E =</math><br/> <math>-16.60 \text{ kcal mol}^{-1}</math><br/> <math>\Delta V_{\text{NH}_2} =</math><br/> <math>-49.01 \text{ cm}^{-1}</math><br/> <math>\Delta V_{\text{CN}} =</math><br/> <math>-25.28 \text{ cm}^{-1}</math></p>   | <p>(j)</p>  <p><math>\Delta E =</math><br/> <math>-16.71 \text{ kcal mol}^{-1}</math><br/> <math>\Delta V_{\text{NH}_2} =</math><br/> <math>-167.93 \text{ cm}^{-1}</math><br/> <math>\Delta V_{\text{CN}} =</math><br/> <math>-24.65 \text{ cm}^{-1}</math></p>  |
|                                    | <p>(k)</p>  <p><math>\Delta E =</math><br/> <math>-12.38 \text{ kcal mol}^{-1}</math><br/> <math>\Delta V_{\text{NH}_2} =</math><br/> <math>-70.86 \text{ cm}^{-1}</math><br/> <math>\Delta V_{\text{CN}} =</math><br/> <math>-19.81 \text{ cm}^{-1}</math></p>   | <p>(l)</p>  <p><math>\Delta E =</math><br/> <math>-14.64 \text{ kcal mol}^{-1}</math><br/> <math>\Delta V_{\text{NH}_2} =</math><br/> <math>-123.76 \text{ cm}^{-1}</math><br/> <math>\Delta V_{\text{CN}} =</math><br/> <math>-20.39 \text{ cm}^{-1}</math></p>  |
| <p>NTf<sub>2</sub><sup>-</sup></p> | <p>(m)</p>  <p><math>\Delta E =</math><br/> <math>-16.92 \text{ kcal mol}^{-1}</math><br/> <math>\Delta V_{\text{NH}_2} =</math><br/> <math>-58.89 \text{ cm}^{-1}</math><br/> <math>\Delta V_{\text{CN}} =</math><br/> <math>-25.64 \text{ cm}^{-1}</math></p>  |                                                                                                                                                                                                                                                                                                                                                    |
|                                    | <p>(n)</p>  <p><math>\Delta E =</math><br/> <math>-16.89 \text{ kcal mol}^{-1}</math><br/> <math>\Delta V_{\text{NH}_2} =</math><br/> <math>-40.84 \text{ cm}^{-1}</math><br/> <math>\Delta V_{\text{CN}} =</math><br/> <math>-24.54 \text{ cm}^{-1}</math></p> | <p>(o)</p>  <p><math>\Delta E =</math><br/> <math>-16.89 \text{ kcal mol}^{-1}</math><br/> <math>\Delta V_{\text{NH}_2} =</math><br/> <math>-89.77 \text{ cm}^{-1}</math><br/> <math>\Delta V_{\text{CN}} =</math><br/> <math>-25.37 \text{ cm}^{-1}</math></p> |

#### 4. Correlation of the CN stretching frequency using the traditional parameters.

$$\nu_{\text{CN}} = 2228.4 - 8.7818\pi^* + 2.3834\alpha - 10.692\beta$$

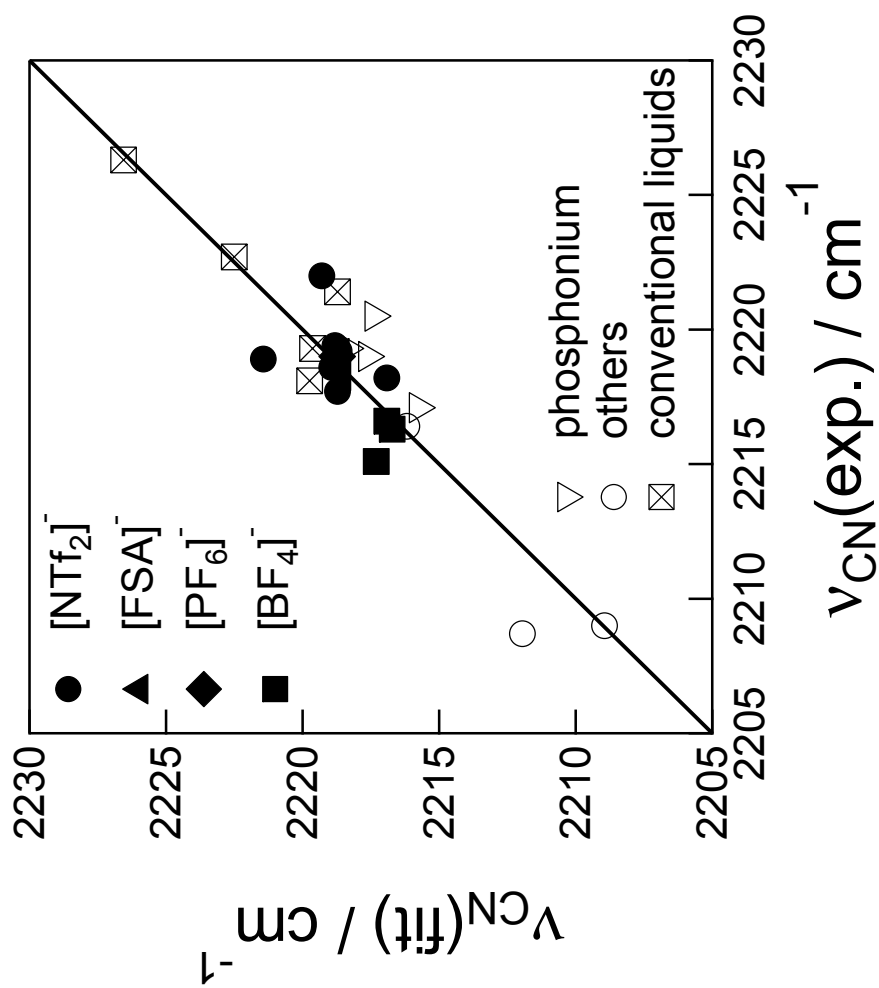

Supplement: c2cp41567d.pdf [file c2cp41567d.pdf]
